# Supplementary material
Source: Springer Nature journal article supplement (https://www.springermedizin.de/resource/supplementary/12936_2012_2461_MOESM10_ESM.pdf/9542910)
Supplement: MOESM10 [file 9542910]

- There is marked heterogeneity in the design of studies assessing relapse prevention (radical cure) by primaquine in vivax malaria.
- The risk of recurrent malaria varies considerably according to primaquine dosing, partner drug, duration of follow up and the geographic location of the study.
- As relapse may occur many weeks after the initial infection if a slowly eliminated antimalarial is given in treatment, studies of relapse prevention should have long follow-up ( $\geq 8$  weeks).
- Recurrence rates following treatment with very low dose primaquine (total dose  $\leq 2.5$  mg/kg) show no significant benefit compared to control patients receiving no anti-relapse medication.
- Low dose regimens (total dose  $> 2.5$  mg/kg and  $< 5.0$  mg/kg) resulted in an adequate response ( $< 10\%$  recurrent infections) in  $32\%$  (26/82) of studies and were only better than a control arm in  $50\%$  (6/12) of studies.
- High dose primaquine regimens (total dose  $\geq 5.0$  mg/kg) have high efficacy (OR=0.03 [95%CI: 0.01-0.13]) compared with patients not receiving primaquine. Few high dose primaquine studies followed patients for more than 2 months.
- High dose regimens administered intermittently over a prolonged period of time (more than 28 days) have significantly lower effectiveness than regimens administered over shorter time courses.
- Reports of serious adverse events were rare in G6PD normal patients, and of a similar magnitude to that reported following other antimalarials such as mefloquine.
